# Supplementary material for: Exosomal lncRNA PVT1/VEGFA Axis Promotes Colon Cancer Metastasis and Stemness by Downregulation of Tumor Suppressor miR‐152‐3p
Source: Hindawi journal article supplement (doi:10.1155/2021/9959807), 2021-01-01
Supplement: f1 [file 9959807.f1.zip]

# **Exosomal lncRNA PVT1/VEGFA axis promotes colon cancer metastasis and stemness by downregulation of tumor suppressor miR-152-3p**

Shiue-Wei Lai<sup>1,2#</sup>, Ming-Yao Chen<sup>3,4#</sup>, Oluwaseun Adebayo Bamodu<sup>5</sup>, Ming-Shou Hsieh<sup>5</sup>, Ting-Yi Huang<sup>5</sup>, Chi-Tai Yeh<sup>5,8</sup>, Wei-Hwa Lee<sup>9</sup> and Yih-Giun Cherng<sup>10,11\*</sup>

1 Division of Hematology-Oncology, Department of Internal Medicine, Tri-Service General Hospital, National Defense Medical Center, Taipei, Taiwan.

2 Department of Internal Medicine, Tri-Service General Hospital Penghu Branch, Penghu, Taiwan.

3 Division of Gastroenterology and Hepatology, Department of Internal Medicine, Shuang Ho Hospital, New Taipei City, Taiwan.

4 Division of Gastroenterology and Hepatology, Department of Internal Medicine, School of Medicine, College of Medicine, Taipei Medical University, Taipei, Taiwan.

5 Department of Medical Research & Education, Taipei Medical University - Shuang Ho Hospital, New Taipei City, 235, Taiwan.

6 Department of Medical Laboratory Science and Biotechnology, Yuanpei University of Medical Technology, Hsinchu 300, Taiwan.

7 Department of Pathology, Taipei Medical University-Shuang Ho Hospital, New Taipei City, Taiwan

8 Department of Anesthesiology, Shuang Ho Hospital, Taipei Medical University, New Taipei City, Taiwan.

9 Department of Anesthesiology, School of Medicine, College of Medicine, Taipei Medical University, Taipei, Taiwan.

# These authors have contributed equally to this work

\* Correspondence:

Dr. Yih-Giun Cherng, MD

Department of Anesthesiology, Shuang Ho Hospital, Taipei Medical University, New Taipei City, Taiwan. No. 291, Zhongzheng Road, Zhonghe District, New Taipei City, Taiwan 235.

Email: [stainless@s.tmu.edu.tw](mailto:stainless@s.tmu.edu.tw)

Tel.: +886-2-2490088 ext. 8885

**Supplementary Table 1.** Primer sequences used in this study

| Gene         | Forward sequence         | Reverse sequence       |
|--------------|--------------------------|------------------------|
| <i>PVT1</i>  | TCGAGGTCATAGTTCCTGTTGG   | GCCCCTTCTATGGGAATCACTA |
| <i>EGFR</i>  | GGCACTTTTGAAGATCATTTTCTC | CTGTGTTGAGGGCAATGAG    |
| <i>VEGFA</i> | ATCTGCATGGTGATGTTGGA     | GGGCAGAATCATCACGAAGT   |
| <i>GAPDH</i> | GAGTCAACGGATTTGTCGT      | GACAAGCTTCCCGTTCTCAG   |
| <i>RPL19</i> | ATGACTGCATCGTTGATAAAATCC | GGCGCAAATCCTCATTCTC    |

**Supplementary Table 2.** Clinical table (GSE17537) of Figure 1B

| Clinicopathological Variables | No. | PVT1            |                | x <sup>2</sup> | p-value |
|-------------------------------|-----|-----------------|----------------|----------------|---------|
|                               |     | High expression | Low expression |                |         |
| Age, years                    |     |                 |                |                |         |
| ≤62                           | 29  | 12              | 17             | 2.229          | 0.135   |
| >62                           | 26  | 16              | 10             |                |         |
| Gender                        |     |                 |                |                |         |
| Male                          | 26  | 9               | 17             | 5.238          | 0.022   |
| Female                        | 29  | 19              | 10             |                |         |
| Primary Stage                 |     |                 |                |                |         |
| I+II                          | 19  | 8               | 11             | 0.900          | 0.343   |
| III+IV                        | 36  | 20              | 16             |                |         |

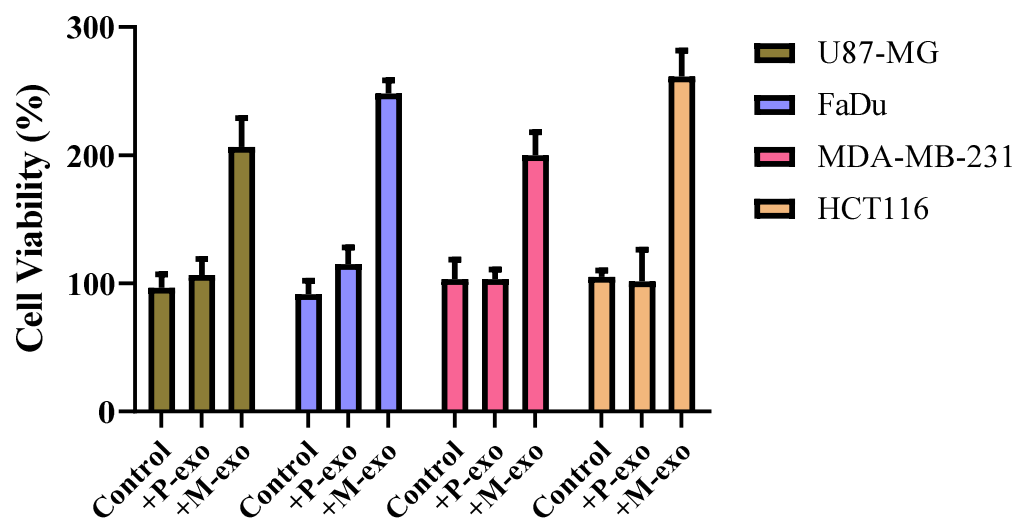

**Supplementary Figure S1.** Cell viability of different cancer cell lines with exosome treatment.

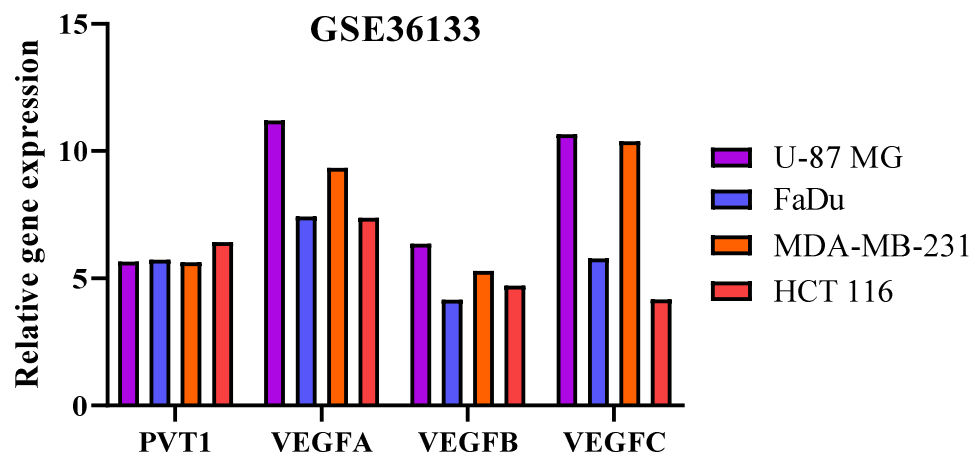

**Supplementary Figure S2.** Gene expression of PVT1 and VEGF family in different cancer cell lines.

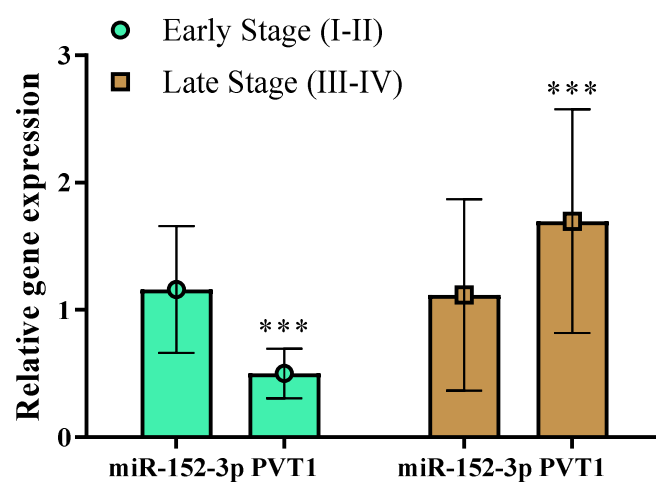

**Supplementary Figure S3.** Relative gene expression of miR-152-3p and PVT1 in primary stages

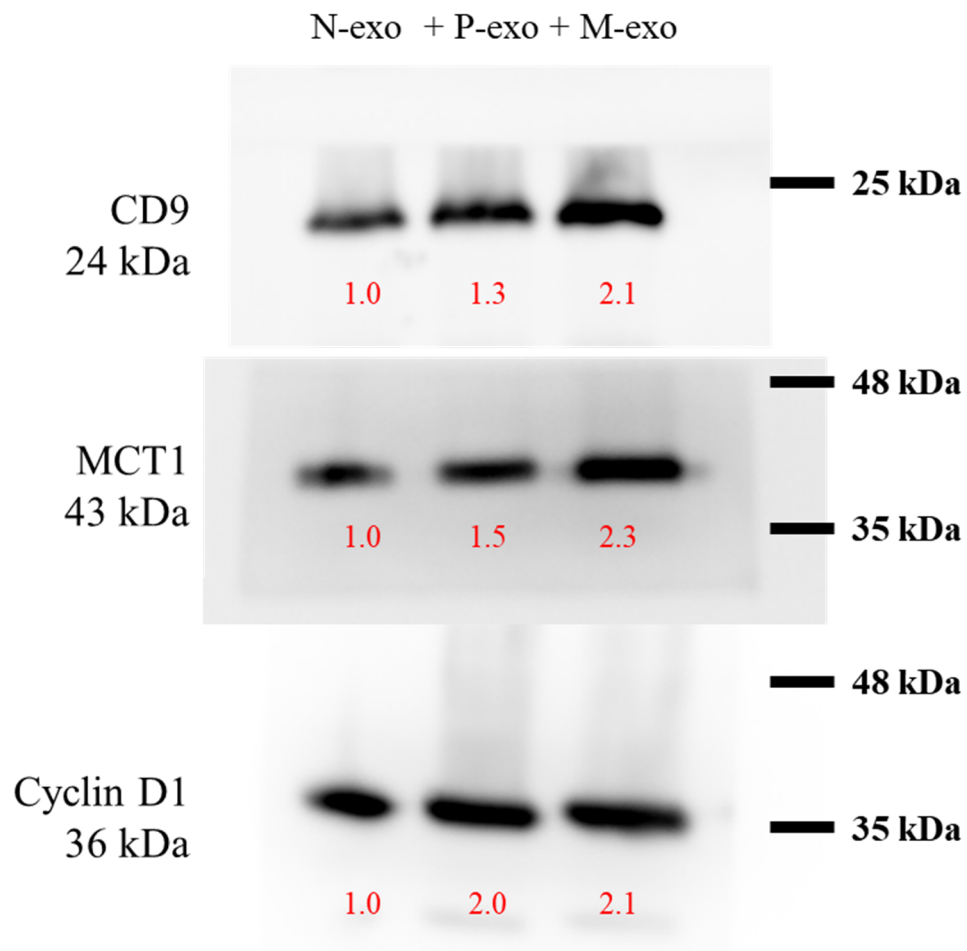

**Supplementary Figure S4.** Full-size blots of Figure 2A

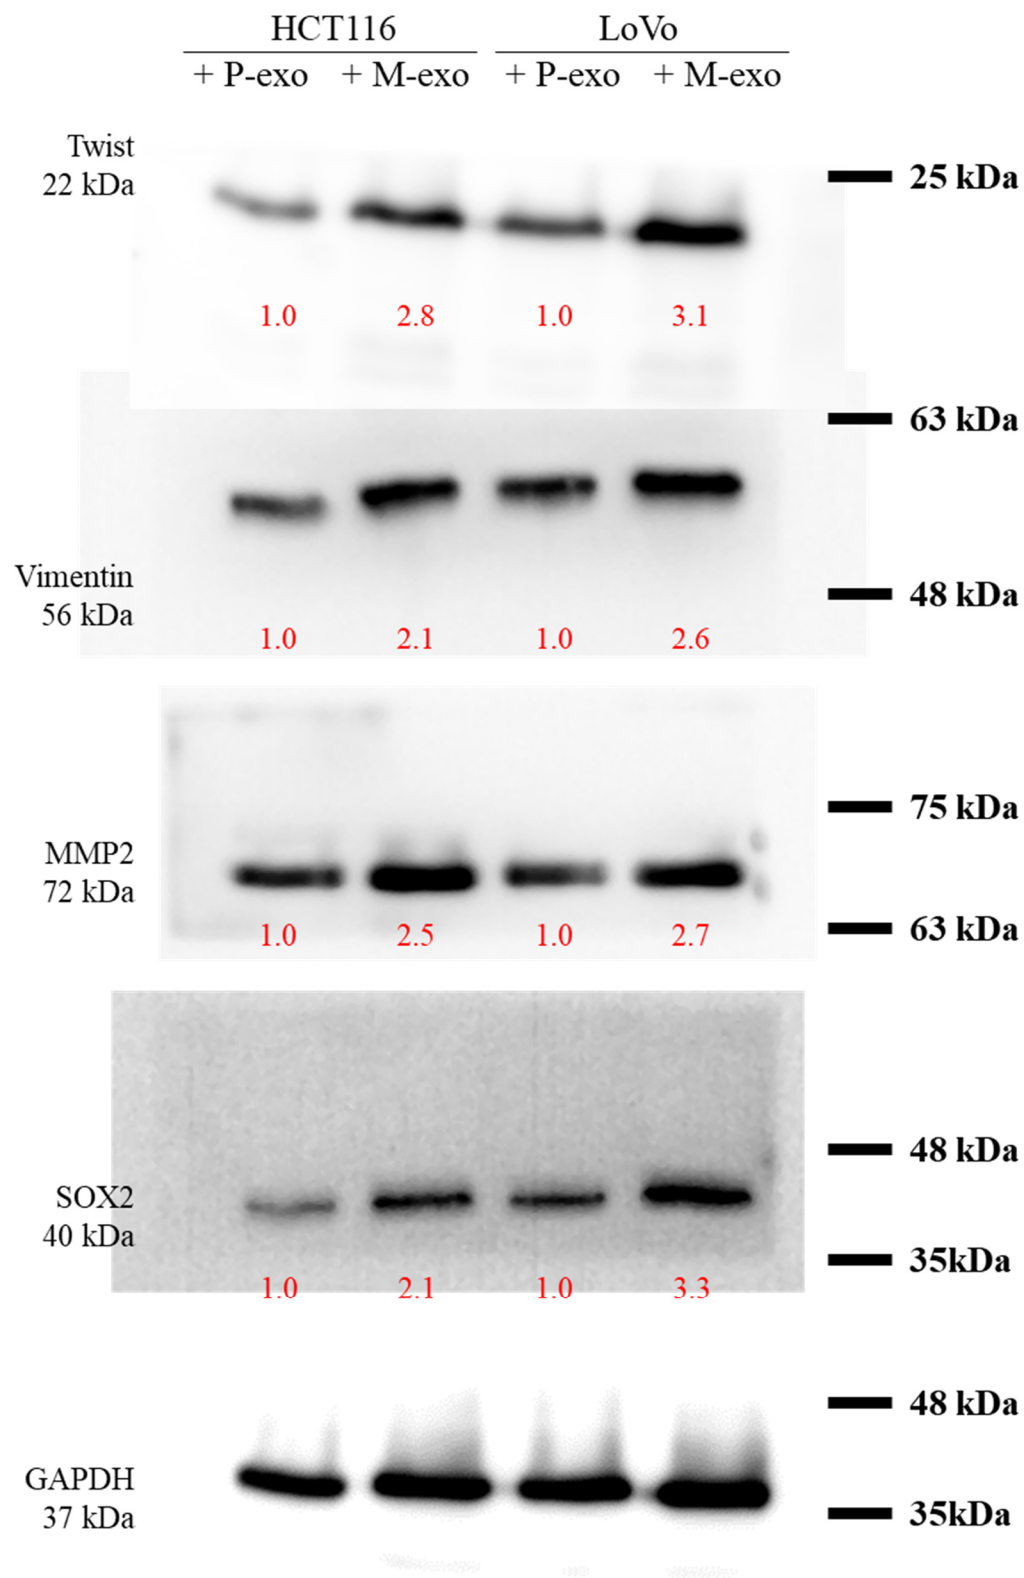

**Supplementary Figure S5.** Full-size blots of Figure 2E



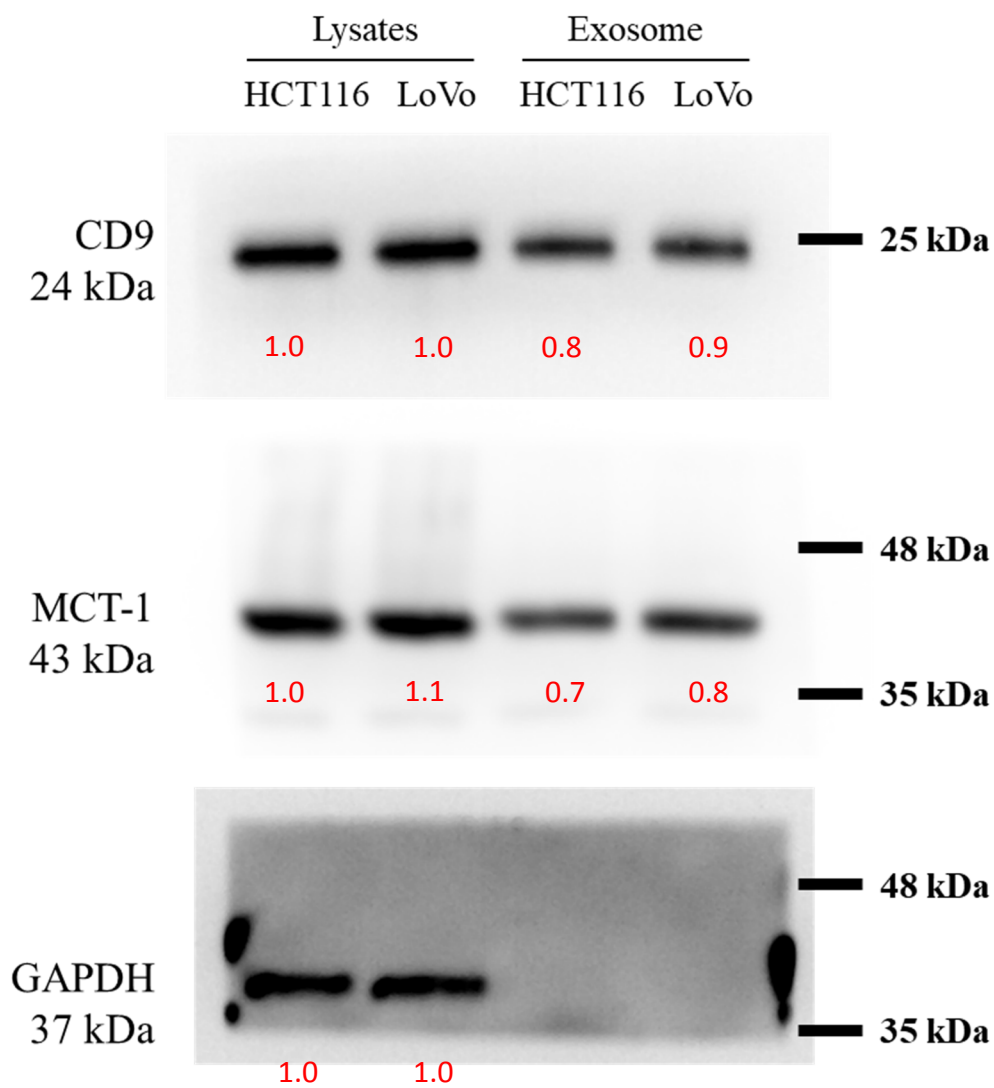

**Supplementary Figure S6.** Full-size blots of Figure 4B

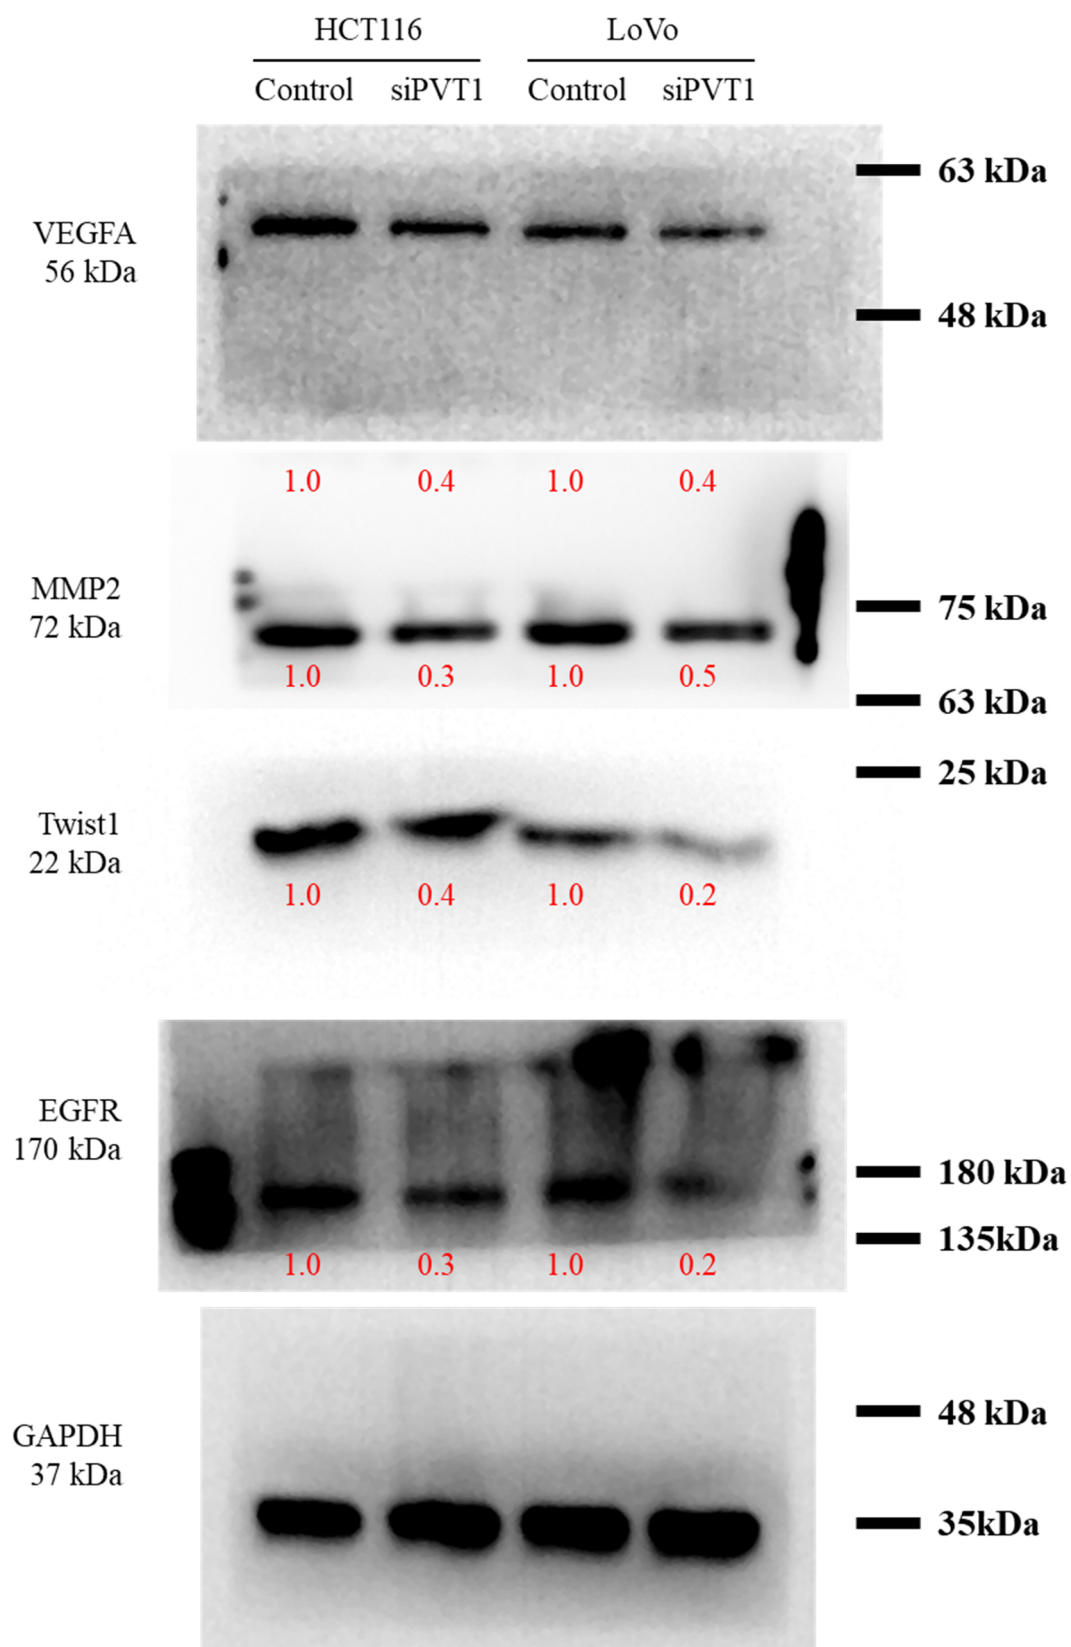

**Supplementary Figure S7.** Full-size blots of Figure 4E

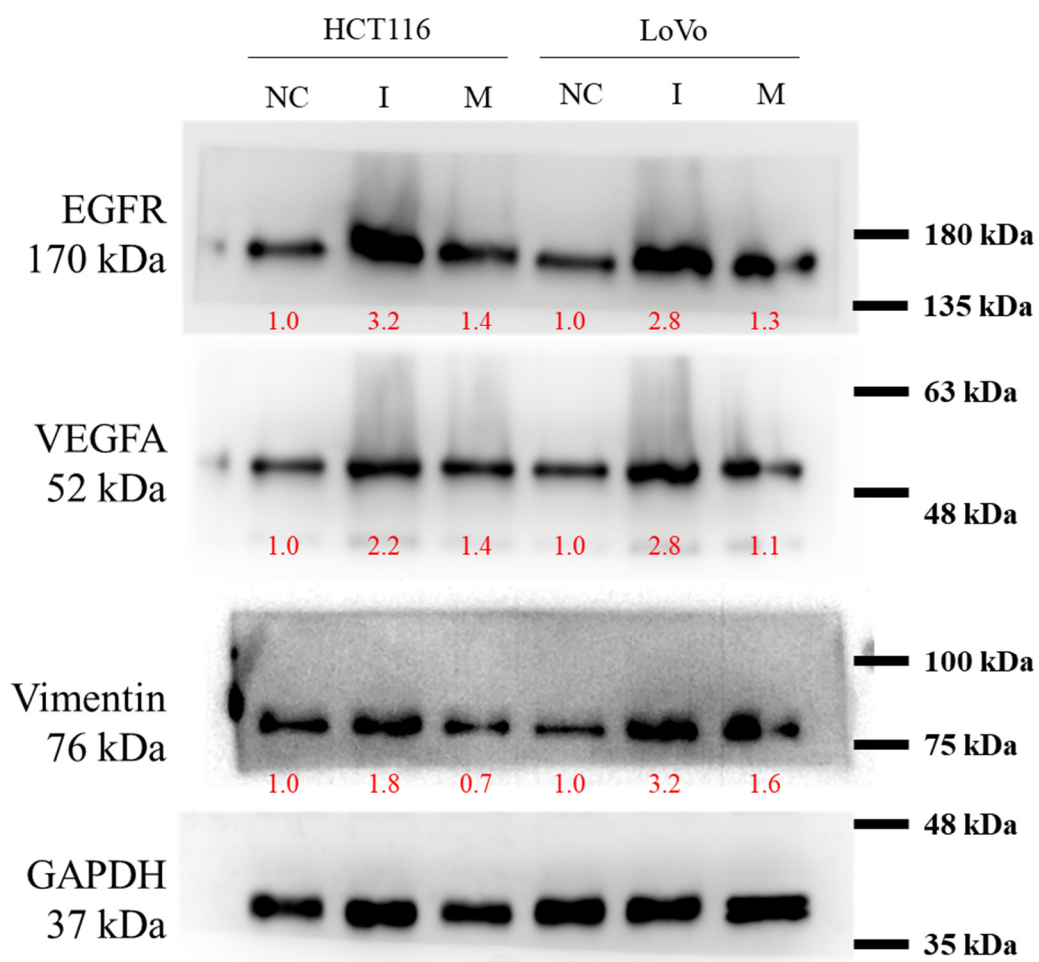

**Supplementary Figure S8.** Full-size blots of Figure 5E

## *In vitro* model

HCT116 and LoVo cell lines

P-exo

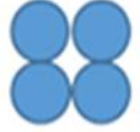

M-exo

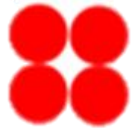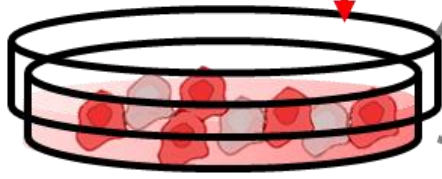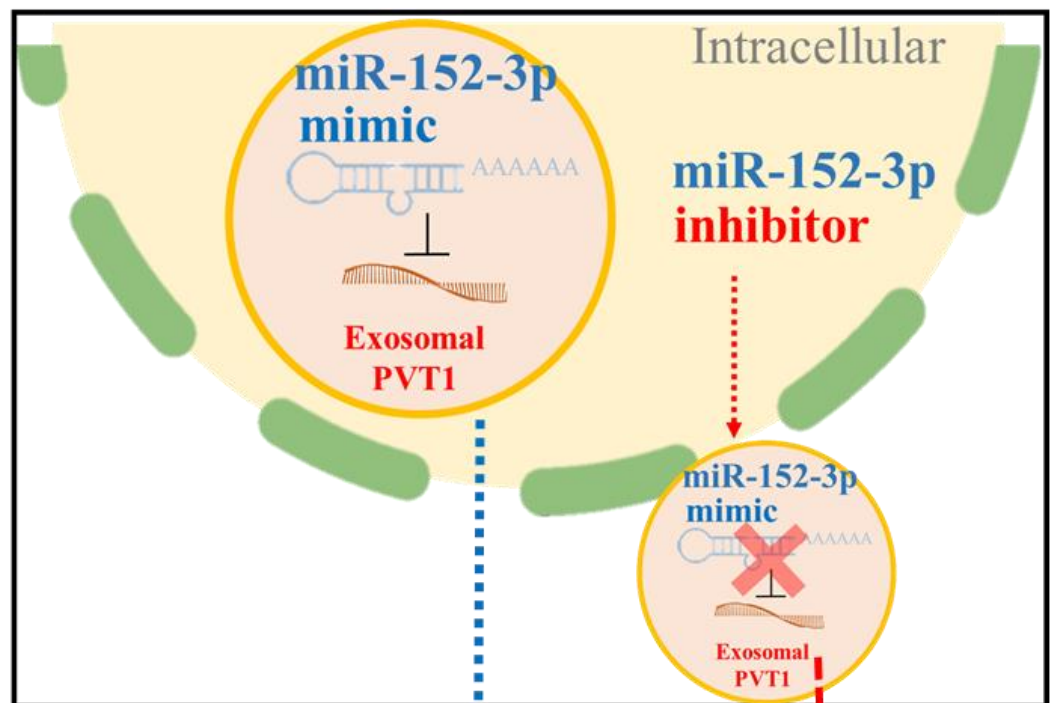

Twist  
MMP2  
SOX2  
Vimentin

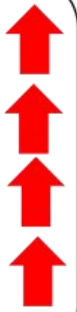

Tumor sphere  
Invasion

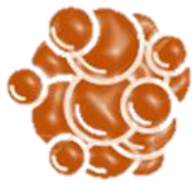

VEGFA  
EGFR  
Vimentin

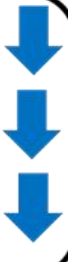

VEGFA  
EGFR  
Vimentin

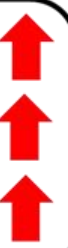

# Colon cancer

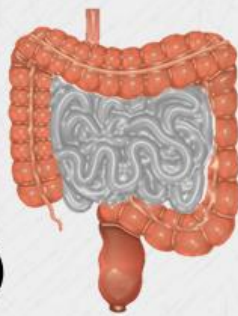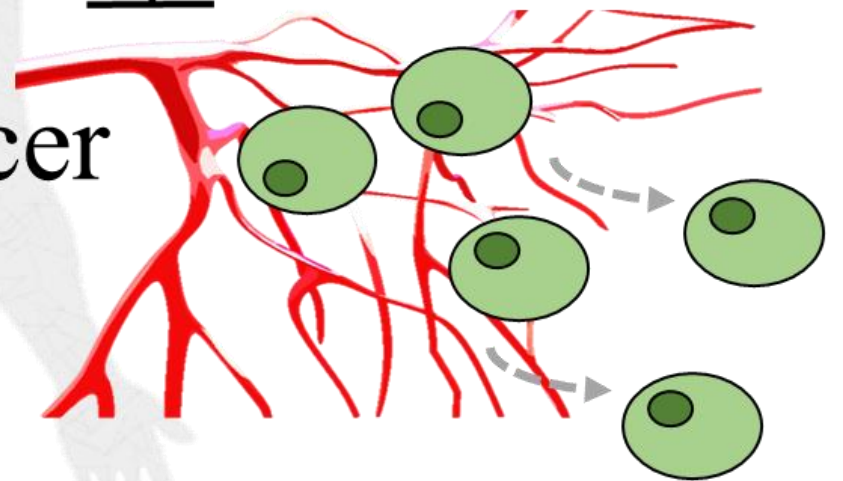

Metastatic cells

## *In vivo* model

Patient-derived xenograft (PDX)

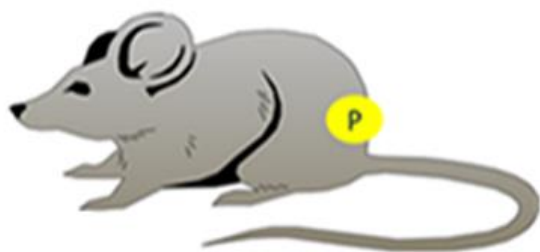

Primary tumor (P-exo)

P-exo

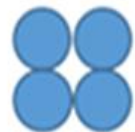

M-exo

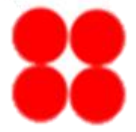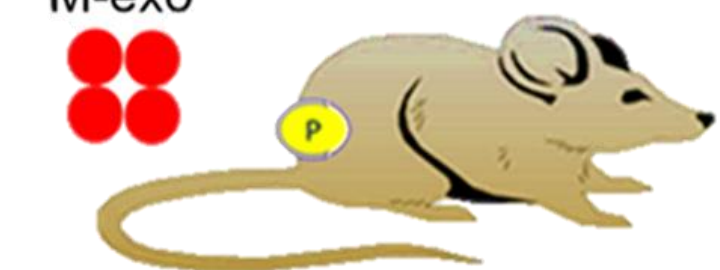

Distant metastasis (M-exo)

Figure 6
