# Supplementary material for: Exosomal lncRNA PVT1/VEGFA Axis Promotes Colon Cancer Metastasis and Stemness by Downregulation of Tumor Suppressor miR-152-3p
Source: Oxid Med Cell Longev. 2021 Jul 15;2021:9959807. doi: 10.1155/2021/9959807 (PMC8315867; doi:10.1155/2021/9959807)
Supplement: Supplementary Materials — Supplementary Table 1: primer sequences used in this study. Supplementary Table 2: clinical table (GSE17537) of Figure 1(b). Supplementary Figure S1: cell viability of different cancer cell lines after exosome treatment. Supplementary Figure S2: gene expression of the PVT1 and VEGF family in different cancer cell lines. Supplementary Figure S3: relative gene expression of miR-152-3p and PVT1 in primary stages. Supplementary Figure S4: full-size blots of Figure 2(a). Supplementary Figure S5: full-size blots of Figure 2(e). Supplementary Figure S6: full-size blots of Figure 4(b). Supplementary Figure S7: full-size blots of Figure 4(e). Supplementary Figure S8: full-size blots of Figure 5(e). [file 9959807.f1.zip]

Archive with 2 entries (2 files):
- Supplementary data  HMS final_0522.docx
- Supplementary data  HMS final_0522-Meraged.pdf
